# Supplementary material
Source: Springer Nature journal article supplement (https://www.springermedizin.de/resource/supplementary/12888_2006_161_MOESM1_ESM.doc/9482030)
Supplement: MOESM1 [file 9482030]

**96 patients** **on CBT waiting list**

**Drop-outs, 25**

**71 patients actually started the CBT program**

**Drop-outs, 11**

**60 patients** **completed the program**

**Patients**

**with missing IE data, 17**

**Patients with full IE data, 43**
